# Supplementary material
Source: PubMed Central journal article supplement (PMC4142073)

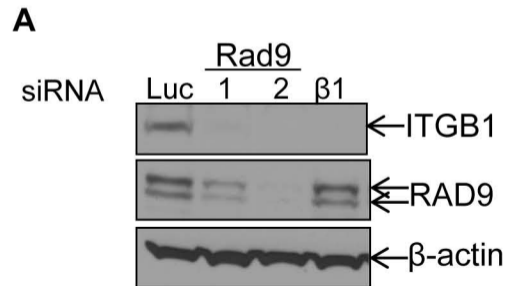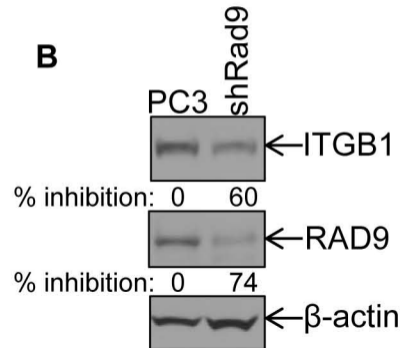

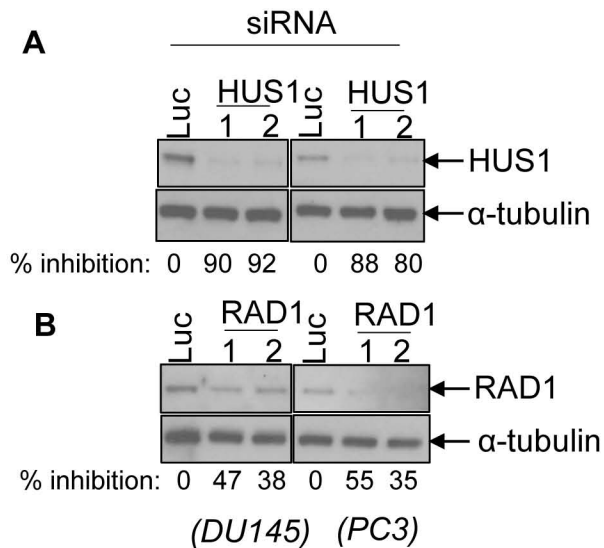

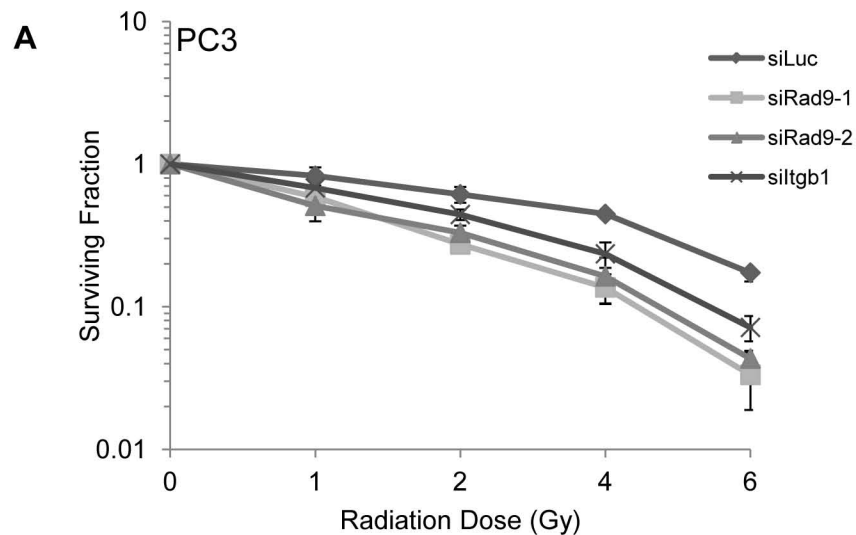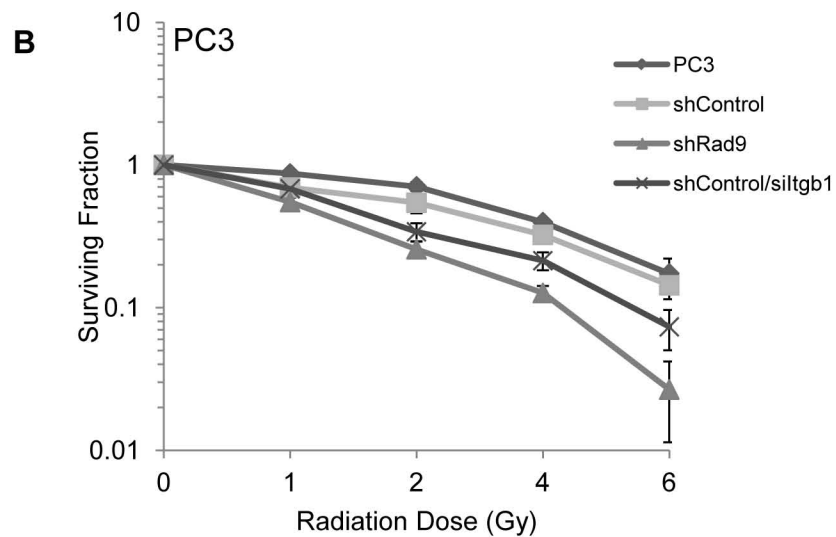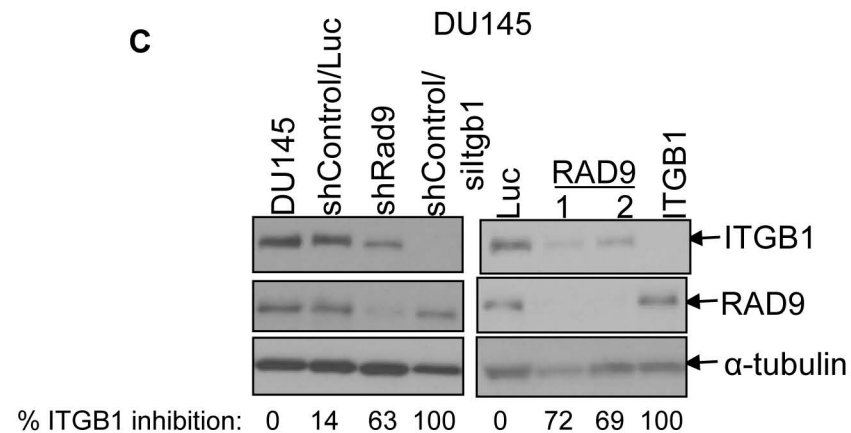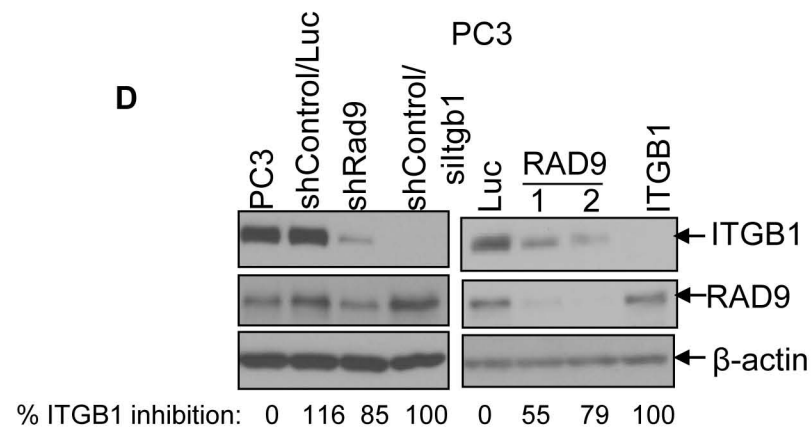

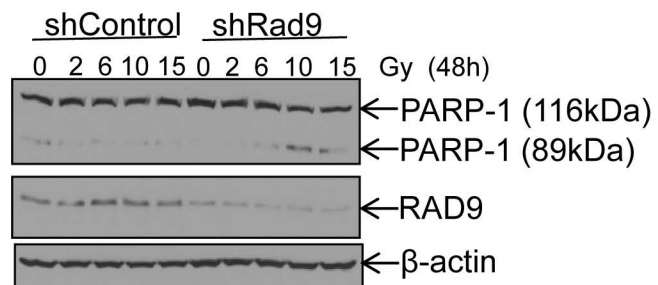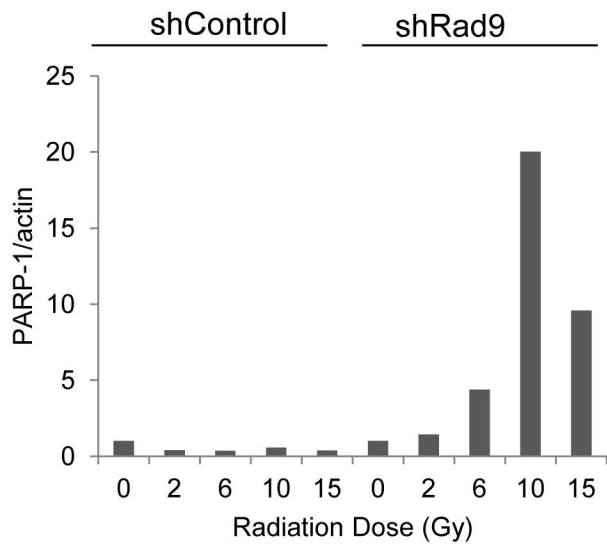

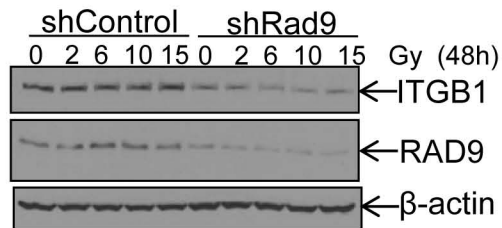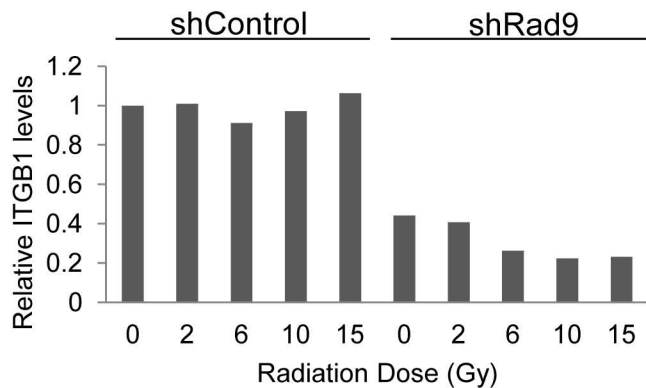

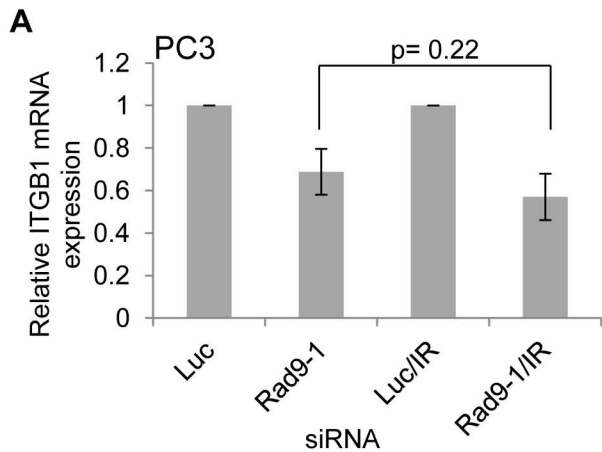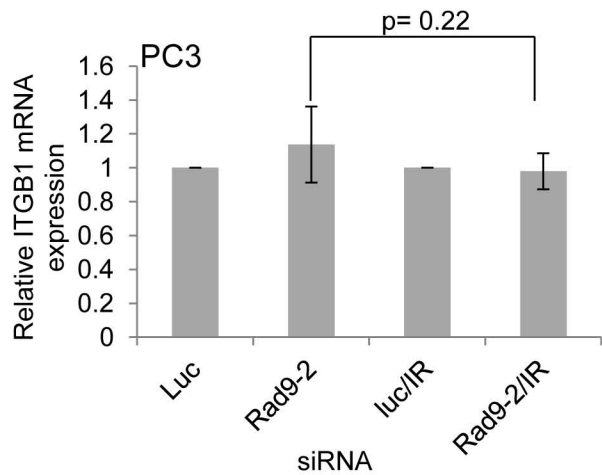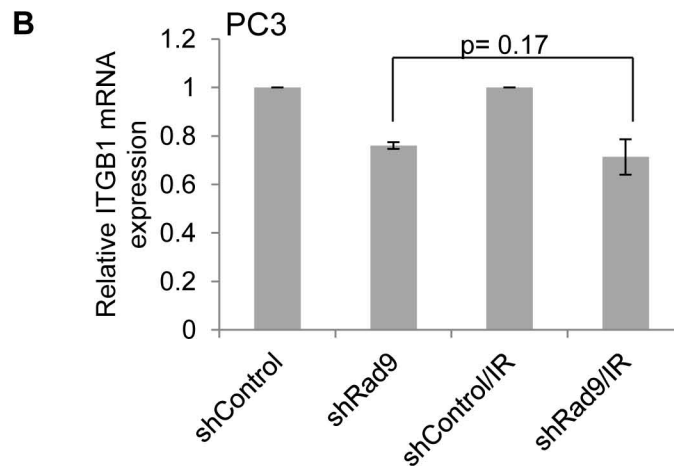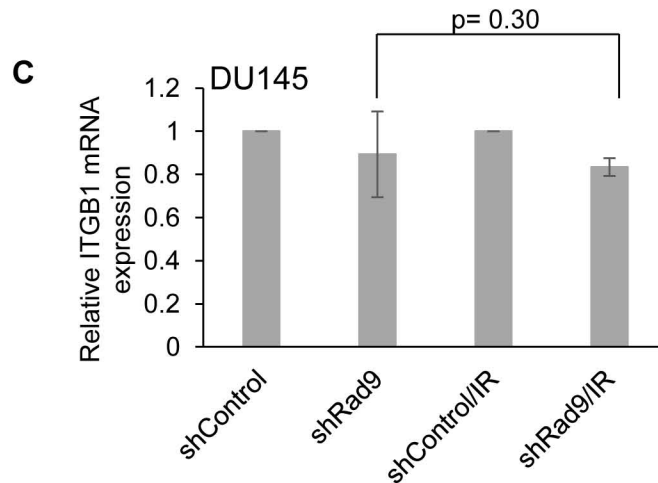

Supplement: NIHMS604640-supplement-Supp_Fig_S1-S6.pdf [file NIHMS604640-supplement-Supp_Fig_S1-S6.pdf]
